# Supplementary material for: Ethane oxidative dehydrogenation with CO2 on thiogallates
Source: Royal Society of Chemistry journal article supplement (doi:10.1039/d2qi01630c), 2022-01-01
Supplement: d2qi01630c1.pdf [file d2qi01630c1.pdf]

## Supporting Information for

### Ethane Oxidative Dehydrogenation with CO<sub>2</sub> on thiogallates

Vera Bikbaeva<sup>a</sup>, Olivier Perez<sup>b</sup>, Nikolay Nesterenko<sup>\*c</sup>, Valentin Valtchev<sup>a</sup>

<sup>a</sup> *Laboratoire Catalyse et Spectrochimie, ENSICAEN, Université de Caen, CNRS, 6 Boulevard Maréchal Juin, 14050 Caen, France*

<sup>b</sup> *Laboratoire de cristallographie et sciences des matériaux, ENSICAEN, Université de Caen, CNRS, 6 Boulevard du Marechal Juin, 14050 Caen, France*

<sup>c</sup> *TotalEnergies One Tech Belgium, Zone Industrielle C, 7181, Seneffe, Belgium*

Corresponding Author

\*E-mail: Nikolay.Nesterenko@sulzer.com

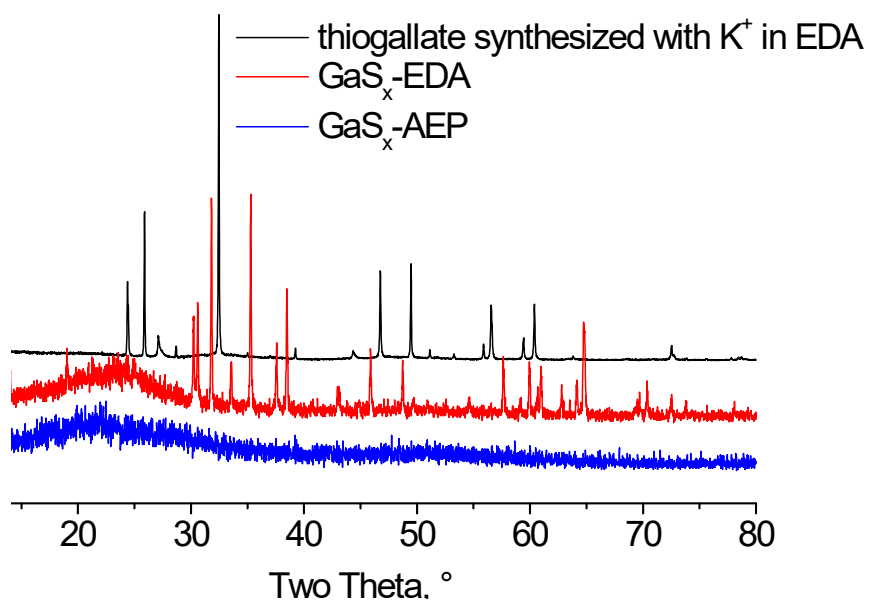

**Fig. S1.** PXRD patterns of the obtained phases in presence or absence of alkali cations with organic templates (EDA, AEP).

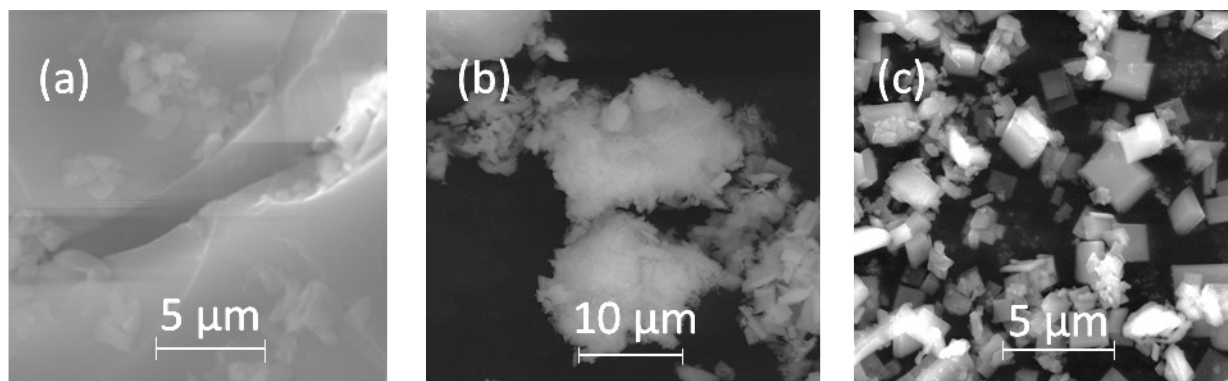

**Fig. S2.** SEM micrographs of the solids obtained at 190 °C for 7d from (a) Ga-S-AEP, (b) Ga-S-EDA systems, (c) Ga-S-EDA with  $K^+$ .

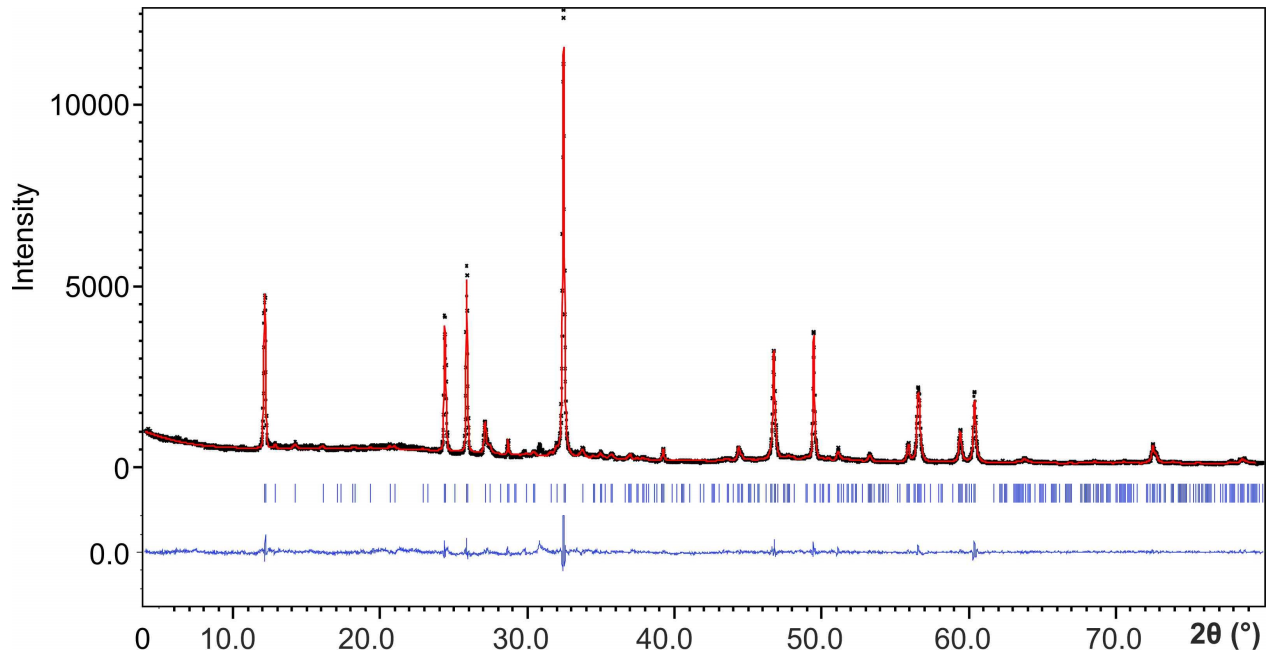

**Fig. S3.** PXRD patterns of as-prepared KGaS<sub>2</sub> with EDA attesting of the sample purity. Cross symbol is the observed signal, red line is the calculated signal, blue segments show the position of the expected reflections, blue line the differences between observed and calculated intensities.

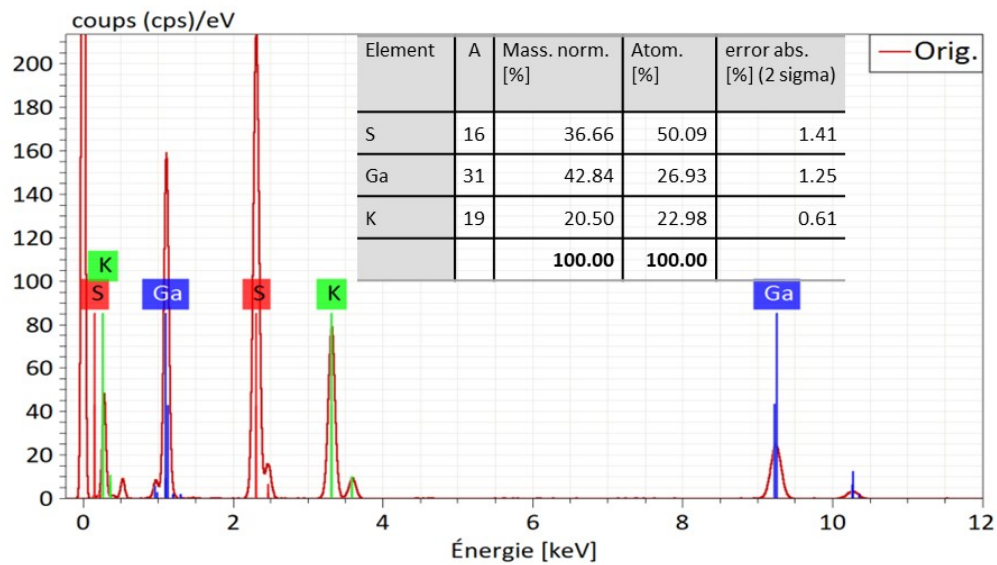

**Fig. S4.** EDS KGaS<sub>2</sub> and elemental quantitative data of the KGaS<sub>2</sub>.

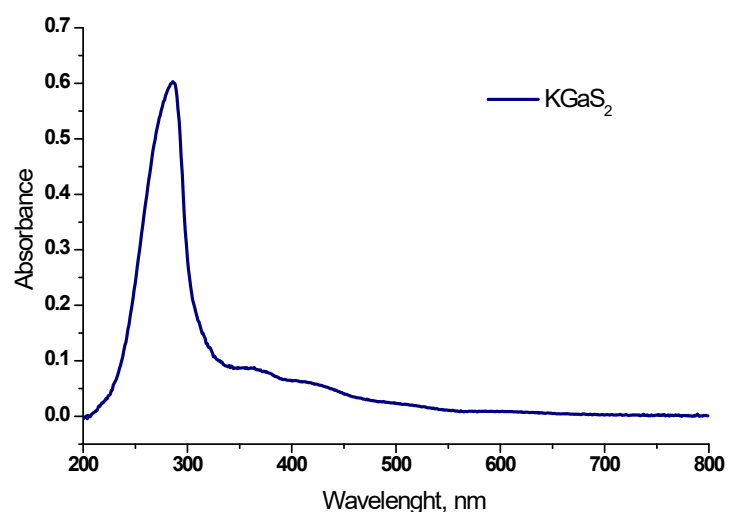

**Fig. S5.** UV-Vis absorption spectra of the EDA synthesized.

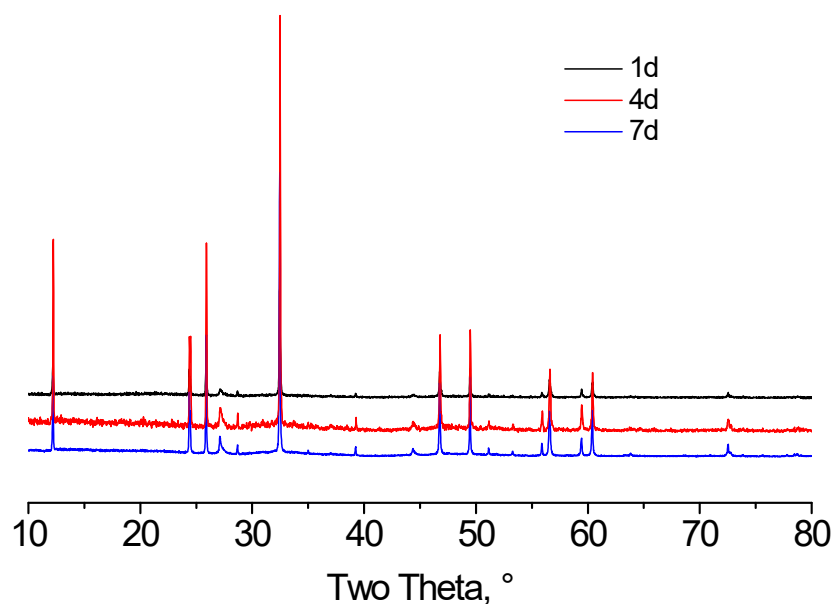

**Fig. S6.** PXRD patterns of as-prepared KGaS<sub>2</sub> with various crystallization time (1-7 days).

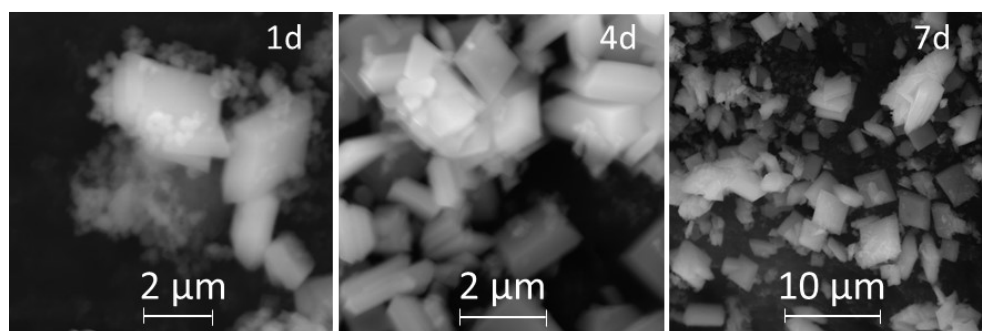

**Fig. S7.** SEM micrographs of KGaS<sub>2</sub> with ethylenediamine at 190 °C were prepared in the period of 1-7d.

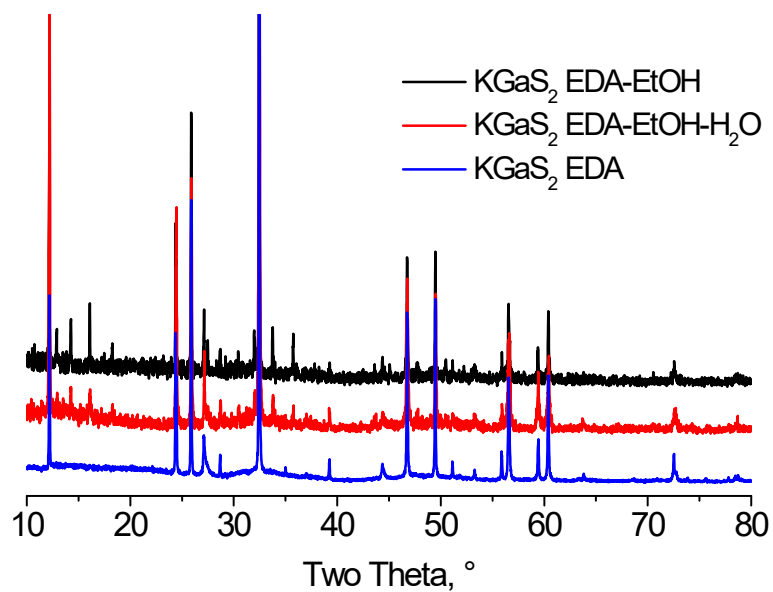

**Fig. S8.** PXRD patterns of  $\text{KGaS}_2$  prepared with different solvents at  $190^\circ\text{C}$  for 7 days.

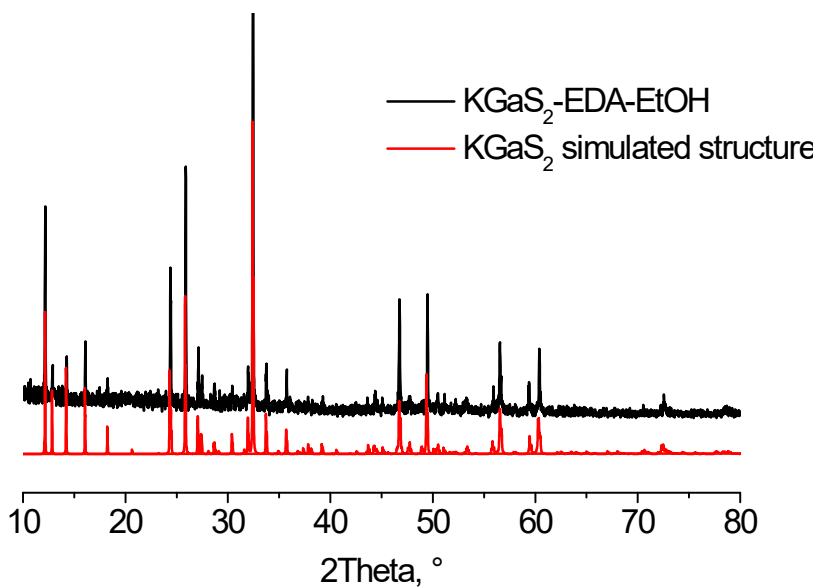

**Fig. S9.** PXRD patterns of as-prepared  $\text{KGaS}_2$  with EDA-EtOH and simulated structure.

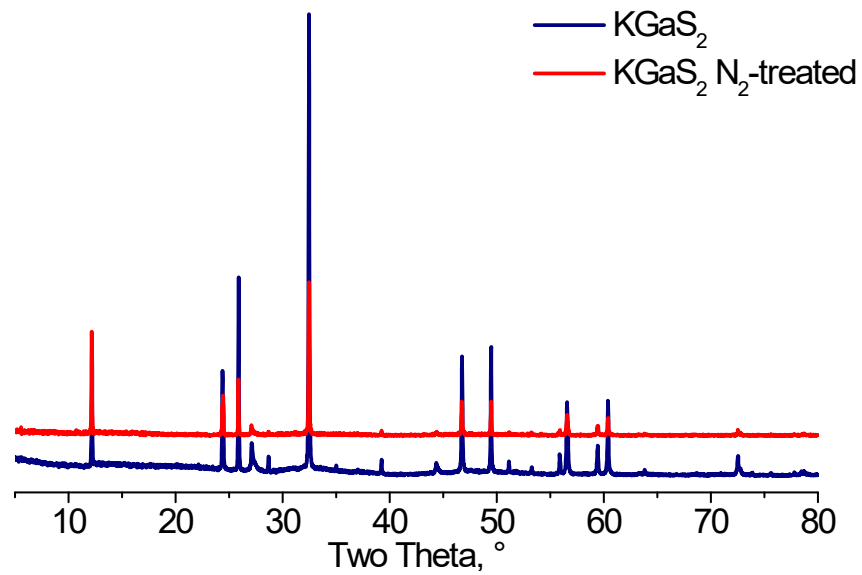

**Fig. S10.** PXRD patterns of KGaS<sub>2</sub> as-prepared and N<sub>2</sub>-treated sample at 800 °C.

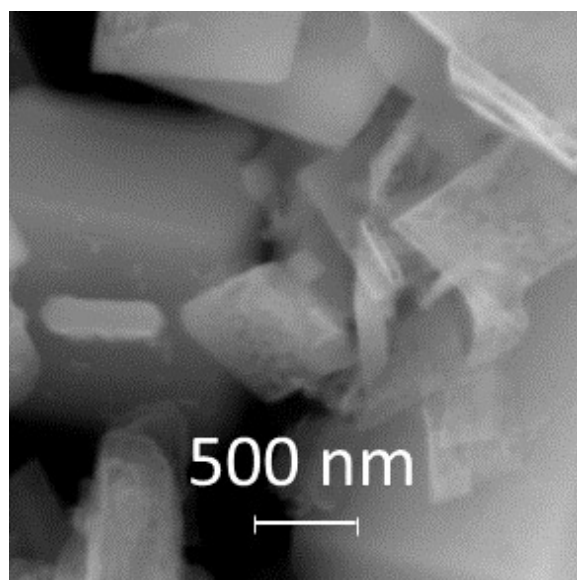

**Fig. S11.** SEM images of KGaS<sub>2</sub> N<sub>2</sub>-treated at 800 °C.

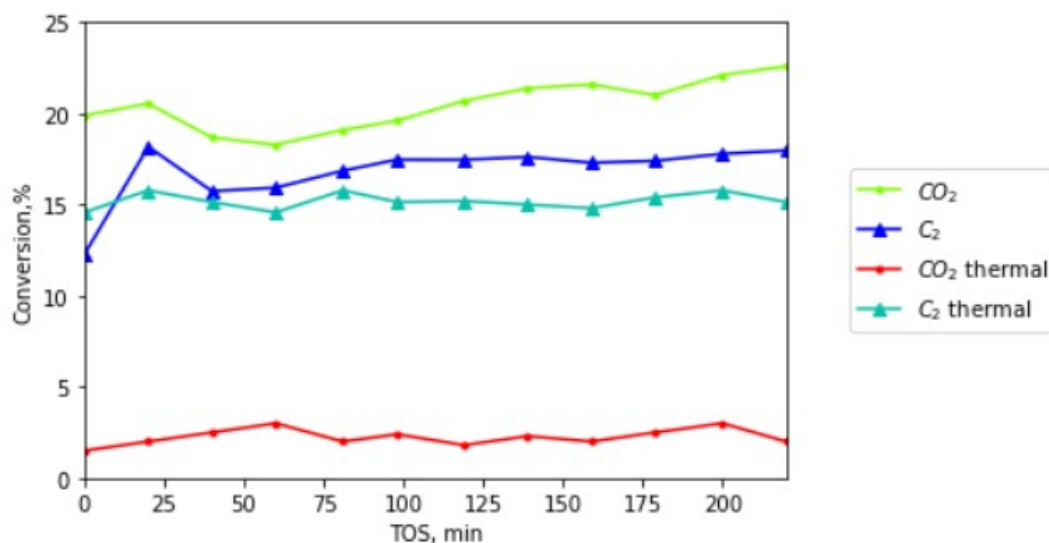

**Fig. S12.** C<sub>2</sub>H<sub>6</sub> and CO<sub>2</sub> conversion on KGaS<sub>2</sub> based catalysts (P = 1 atm, C<sub>2</sub>H<sub>6</sub>/CO<sub>2</sub> = 1/0.74, WHSV = 5.9 h<sup>-1</sup>, 700 °C).

mbe

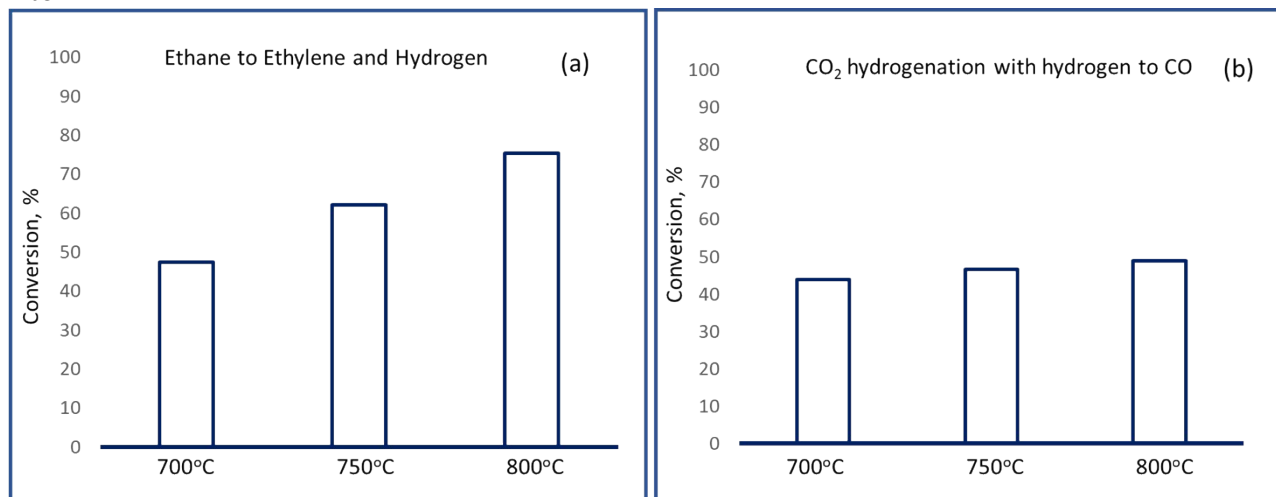

**Fig. S13.** Thermodynamic equilibrium conversions at different temperature, assuming isothermal temperature profile for a) ethane conversion to ethylene and hydrogen at atmospheric pressure b) CO<sub>2</sub> hydrogenation with hydrogen (CO<sub>2</sub>/H<sub>2</sub> -1) to CO at atmospheric pressure (calculated with AspenHysys v12)



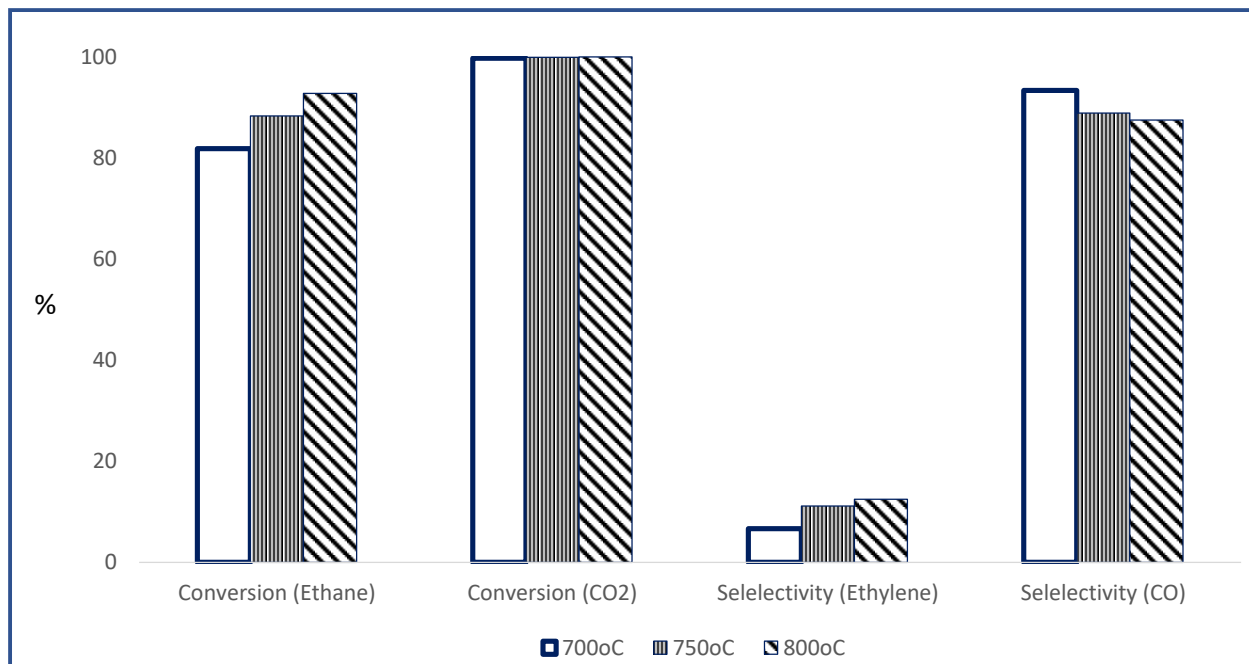

**Fig. S14.** Equilibrium product distribution at different temperature, assuming isothermal temperature profile in the system (CO, CO<sub>2</sub>, ethane, ethylene, hydrogen) containing initially the equal molar composition of CO<sub>2</sub> and ethane at atmospheric pressure (calculated with AspenHysys v12)
